# Supplementary material for: Circulating tumor cells and palbociclib treatment in patients with ER-positive, HER2-negative advanced breast cancer: results from a translational sub-study of the TREnd trial
Source: PubMed Central journal article supplement (PMC7992319; doi:10.1186/s13058-021-01415-w), 2021-03-24

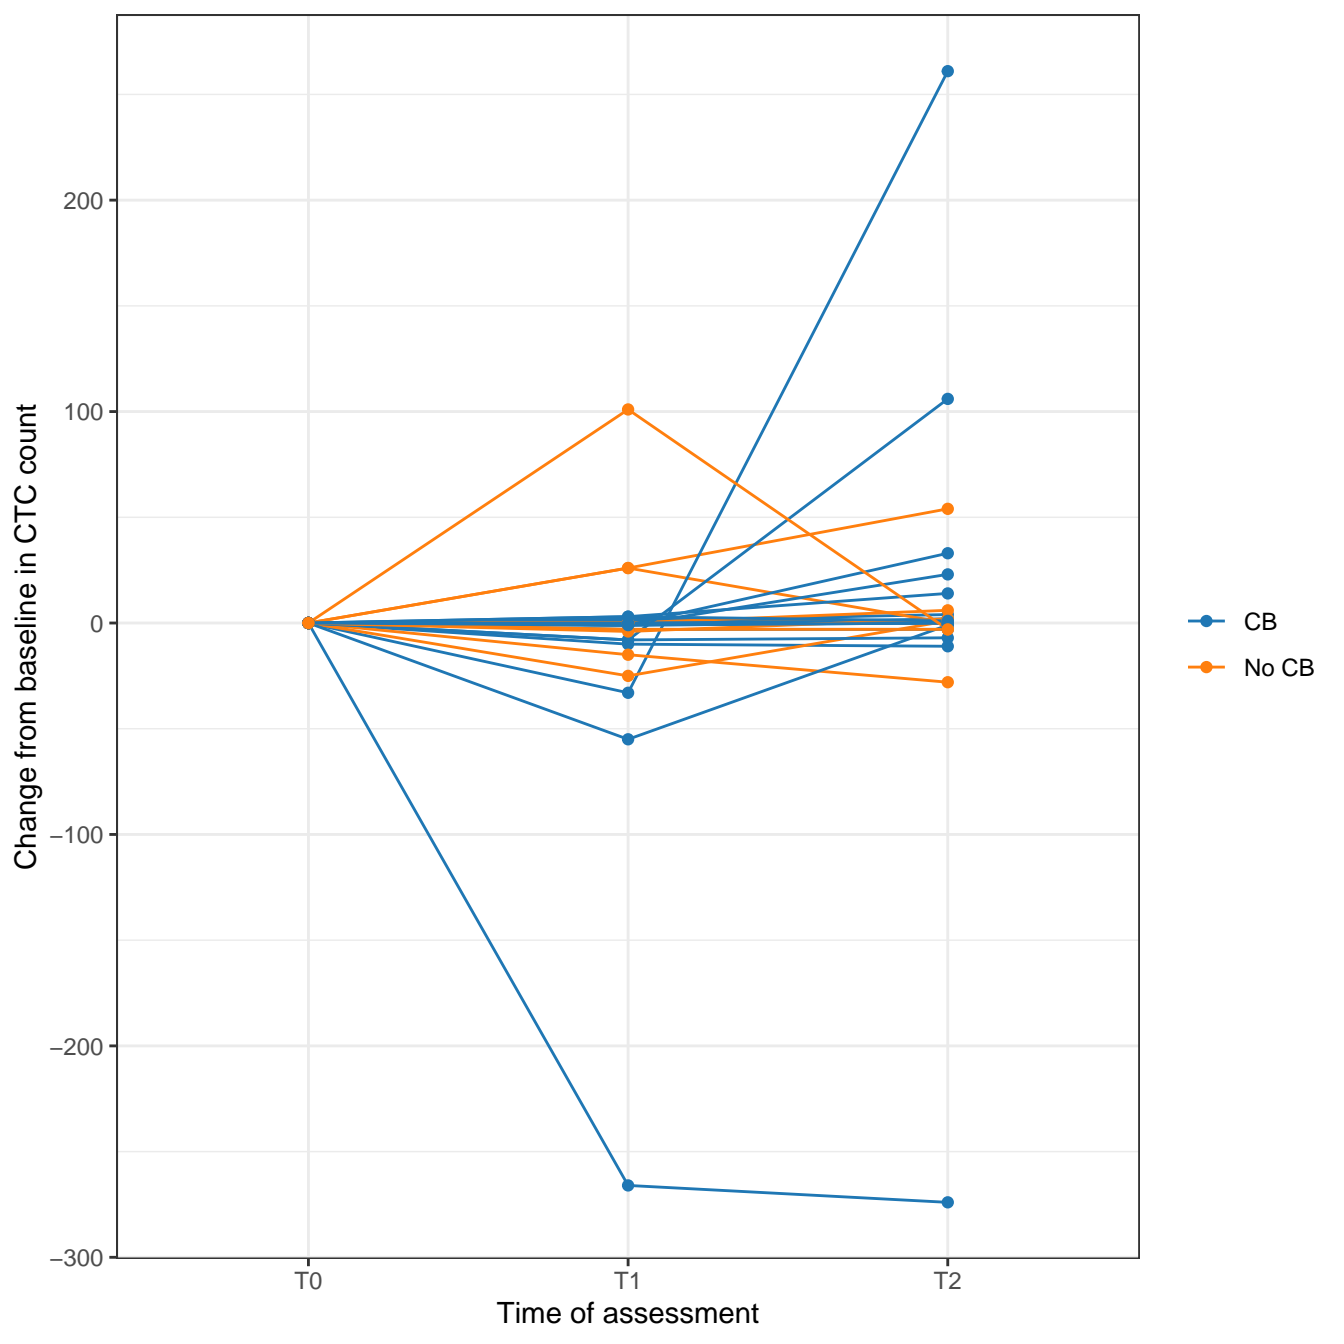

Supplement: 13058_2021_1415_MOESM1_ESM.pdf [file 13058_2021_1415_MOESM1_ESM.pdf]
