# Supplementary material for: Circulating tumor cells and palbociclib treatment in patients with ER-positive, HER2-negative advanced breast cancer: results from a translational sub-study of the TREnd trial
Source: PubMed Central journal article supplement (PMC7992319; doi:10.1186/s13058-021-01415-w), 2021-03-24

A

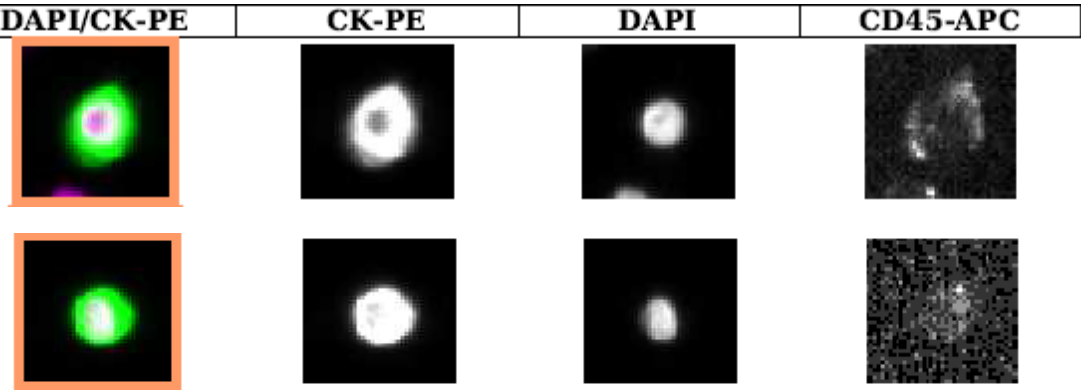

Circulating tumor cells

B

|                                   | Group | pe_0 | dapi_1 | apc_2 | dapi_pe_3 | brightfield_4 |
|-----------------------------------|-------|------|--------|-------|-----------|---------------|
| Cell_id=<br>4862<br>row_nu<br>m=1 | CTC   |      |        |       |           |               |
| Cell_id=<br>3007<br>row_nu<br>m=1 | CTC   |      |        |       |           |               |

C

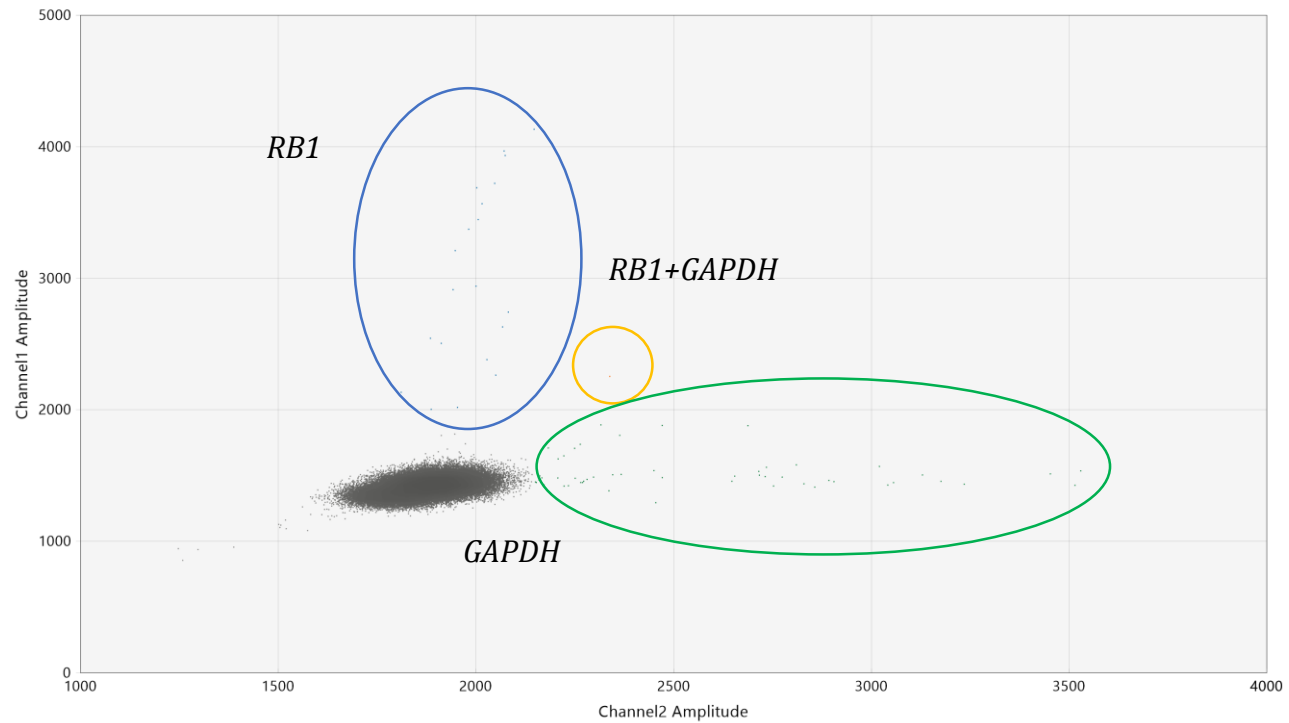

Supplement: 13058_2021_1415_MOESM4_ESM.pdf [file 13058_2021_1415_MOESM4_ESM.pdf]
