# Supplementary material for: Circulating tumor cells and palbociclib treatment in patients with ER-positive, HER2-negative advanced breast cancer: results from a translational sub-study of the TREnd trial
Source: Springer Nature journal article supplement (doi:10.1186/s13058-021-01415-w), 2021-03-24

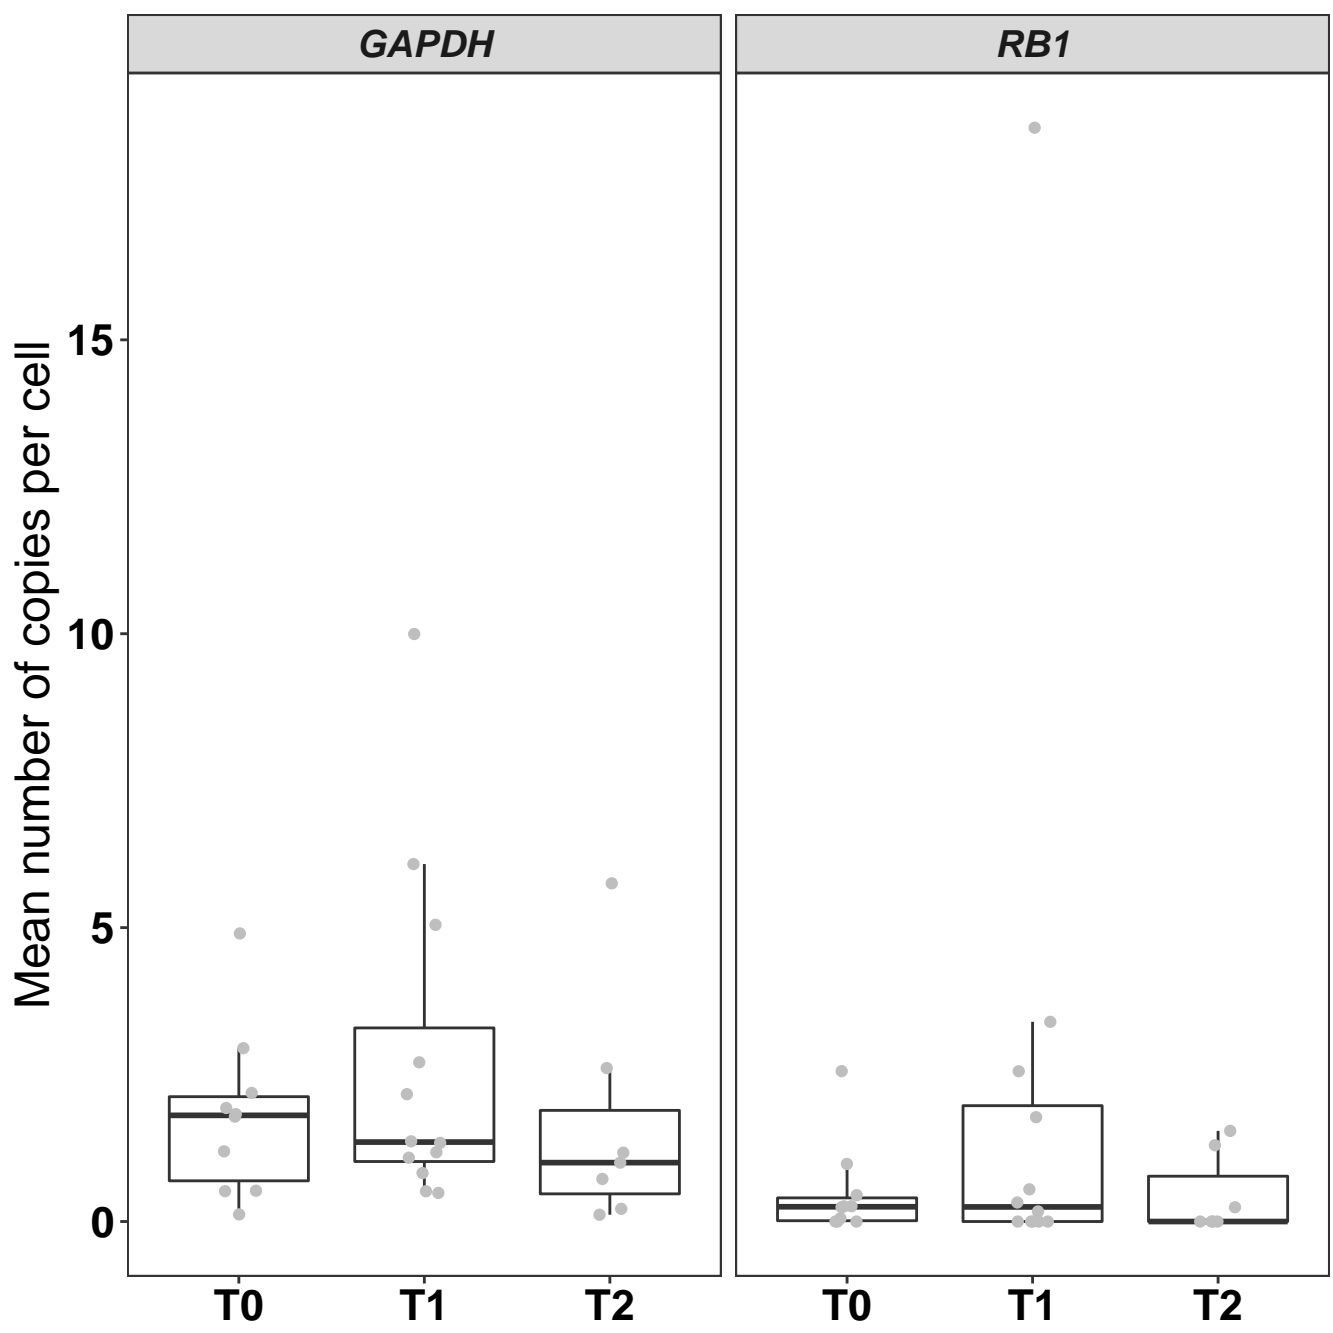

Supplement: MOESM6 [file 18999528]
